# Supplementary material
Source: MDPI journal article supplement (https://www.mdpi.com/2073-4433/13/4/568)
Supplement: s1 [file s1]

## Supplementary Materials:

Natalia Liora <sup>1,\*</sup>, Serafim Kontos <sup>1</sup>, Daphne Parliari <sup>1</sup>, Dimitris Akritidis <sup>2</sup>, Anastasia Poupkou <sup>3</sup>,  
Dimitris K. Papanastasiou <sup>4</sup> and Dimitrios Melas <sup>1</sup>

This supplement provides a Table including the description of the selected monitoring sites in Greece as well as a description of the statistical measures used for the model evaluation.

**Table S1.** Description of the selected monitoring meteorological sites in Greece.

| Monitoring Network                 | Location in Greece | Site Name  | Type of site     | Altitude (m) | Lon(°E)/<br>Lat(°N) |
|------------------------------------|--------------------|------------|------------------|--------------|---------------------|
| NOAA                               | Athens             | Athinai    | Urban/Traffic    | 21           | 37.88/23.73         |
| NOAA                               | Heraklion          | Heraklion  | Suburban/Airport | 35.05        | 25.18/35.34         |
| meteo.gr                           | Athens             | Nea Smyrni | Urban/Traffic    | 51           | 23.72/37.95         |
| meteo.gr                           | Larissa            | Larissa    | Urban/Traffic    | 82           | 22.4/39.63          |
| meteo.gr                           | Ioannina           | Ioannina   | Suburban         | 475          | 20.85/36.92         |
| meteo.gr                           | Patra              | Patra      | Urban/Port       | 3            | 21.74/38.26         |
| Municipality<br>of<br>Thessaloniki | Thessaloniki       | Martiou    | Urban/Traffic    | 20           | 22.96/ 40.60        |
| Municipality<br>of<br>Thessaloniki | Thessaloniki       | Egnatia    | Urban/Traffic    | 15           | 22.94/40.64         |

**Table S2.** Description of the selected air quality monitoring sites in Greece.

| Monitoring Network | Location in Greece         | Site Name | Type of site           | Altitude (m) | Lon(°E)/<br>Lat(°N) |
|--------------------|----------------------------|-----------|------------------------|--------------|---------------------|
| YPEN               | Liosia, Athens             | LIO       | Suburban<br>Background | 165          | 23.69/ 38.07        |
| YPEN               | Nea Smyrni,<br>Athens      | SMY       | Urban<br>Background    | 50           | 23.71/ 37.93        |
| YPEN               | Peristeri,<br>Athens       | PER       | Urban<br>Background    | 80           | 23.68/ 38.01        |
| YPEN               | Agia Paraskevi,<br>Athens  | AGP       | Suburban<br>Background | 290          | 28.81/<br>37.99     |
| YPEN               | Lykovrisi,<br>Athens       | (LYK)     | Suburban<br>Background | 234          | 23.78/<br>38.06     |
| YPEN               | Koropi, Athens             | KOR       | Suburban<br>Background | 140          | 23.87/<br>37.89     |
| YPEN               | Volos                      | VOL       | Urban<br>Background    | 31           | 22.94/<br>39.36     |
| YPEN               | Larissa                    | LAR       | Urban<br>Background    | 85           | 22.41/<br>36.63     |
| YPEN               | Ioannina                   | IOA       | Urban<br>Background    | 520          | 20.85/<br>39.65     |
| YPEN               | Kalamaria,<br>Thessaloniki | KAL       | Suburban<br>Background | 60           | 22.96/ 40.57        |
| YPEN               | Kordelio,                  | KOD       | Urban                  | 30           | 22.89/ 40.67        |

|                                | Thessaloniki |           | Industrial       |     |              |
|--------------------------------|--------------|-----------|------------------|-----|--------------|
| Municipality of Thessaloniki   | Thessaloniki | Dimarxeio | Urban            | 20  | 22.95/ 40.62 |
| Municipality of Thessaloniki   | Thessaloniki | Martiou   | Urban Traffic    | 20  | 22.96/ 40.60 |
| Municipality of Thessaloniki   | Thessaloniki | Lagada    | Urban Traffic    | 20  | 22.93/ 40.65 |
| Municipality of Thessaloniki   | Thessaloniki | Malakopi  | Urban Background | 20  | 22.94/ 40.63 |
| National Observatory of Athens | Athens       | THISSIO   | Urban Background | 105 | 23.72/ 37.97 |

### Description of the statistical measures used for the model evaluation.

The statistical metrics used to evaluate the parameterizations performances are defined as follow:

a) Mean Bias (MB):

$$MB = \frac{\sum_{i=1}^N (M_i - O_i)}{N}$$

as a measure of the data tendency.

(b) Mean Absolute Error (MAE),

$$MAE = \frac{\sum_{i=1}^N |M_i - O_i|}{N}$$

that represents the deviation between the modelled and the observed data.

(c) Factor of two criterion (Fac2):

$$0.5 \leq \frac{M_i}{O_i} \leq 2$$

(d) Pearson's Correlation coefficient (R):

$$R = \frac{\sum_{i=1}^N (M_i - \bar{M})(O_i - \bar{O})}{\sqrt{\sum_{i=1}^N (M_i - \bar{M})^2} \sqrt{\sum_{i=1}^N (O_i - \bar{O})^2}}$$

(e) Index of Agreement (IOA):

$$IOA = 1 - \frac{\sum_{i=1}^N (M_i - O_i)^2}{\sum_{i=1}^N (|M_i - \bar{O}| + |O_i - \bar{O}|)^2}$$

Where  $M_i$  and  $O_i$  denote modelled and observed data, respectively,  $N$  is the number of paired data considered,  $\bar{O}$  and  $\bar{M}$  are the mean of observed and modeled data, respectively.

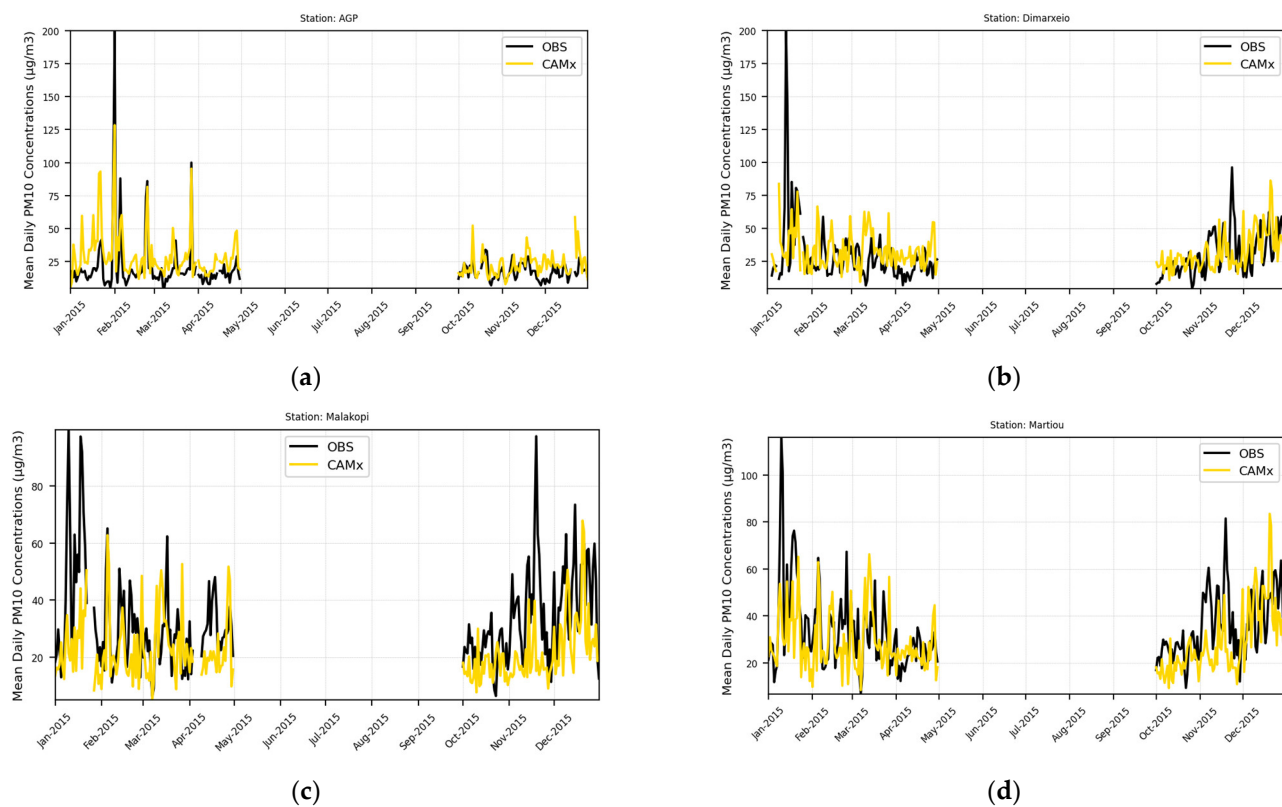

**Figure S1.** Mean daily PM10 concentrations of measurement and simulated data at (a) AGP, (b) Dimarxeio, (c) Malakopi and (d) Martiou stations for the cold period of 2015 (January–April, October–December) for the On-line SCN.
